# Supplementary material for: One amino acid makes a difference–Characterization of a new TPMT allele and the influence of SAM on TPMT stability
Source: PubMed Central journal article supplement (PMC5411961; doi:10.1038/srep46428), 2017-05-02
Supplement: srep46428-s1.pdf [file srep46428-s1.pdf]

## **Supplemental Information**

### **One amino acid makes a difference – Characterization of a new TPMT allele and the influence of SAM on TPMT stability**

#### **Authors**

Iu Yan Ping Heidi<sup>1,6</sup>, Sara Helander<sup>2,6</sup>, Anna Zimdahl Kahlin<sup>2</sup>, Cheung Chun Wah<sup>1</sup>,  
Chi Chung Shek<sup>1</sup>, Leung Moon Ho<sup>3</sup>, Björn Wallner<sup>4</sup>, Lars-Göran Mårtensson<sup>5</sup>, Malin  
Lindqvist Appell<sup>2\*</sup>

#### **Affiliations**

<sup>1</sup> Chemical Pathology Laboratory, Department of Pathology, Queen Elizabeth Hospital, Hong Kong SAR, China.

<sup>2</sup> Division of Drug Research, Department of Medical and Health Sciences, Linköping University, SE-581 85 Linköping, Sweden

<sup>3</sup> Department of Medicine, Queen Elizabeth Hospital, Hong Kong SAR, China.

<sup>4</sup> Division of Bioinformatics, Department of Physics, Chemistry and Biology, Linköping University, 58183 Linköping, Sweden

<sup>5</sup> Division of Chemistry, Department of Physics, Chemistry and Biology, Linköping University, SE-581 83 Linköping, Sweden.

<sup>6</sup> Co-first author

\* Corresponding author: Malin Lindqvist Appell

e-mail: malin.lindqvist.appell@liu.se

## Supplemental figures and tables

### Supplementary figure 1

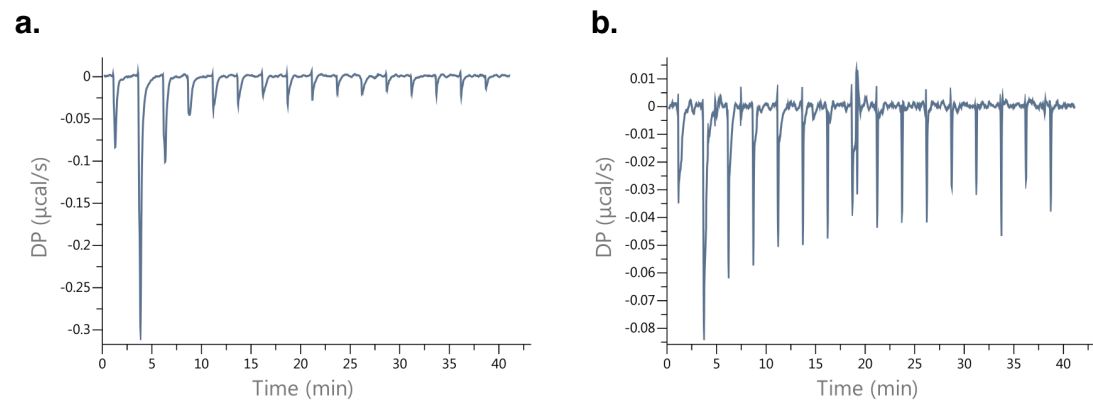

**Figure S1.** ITC data for the titration of SAM to TPMT p.Y240C (a) and TPMT p.Y240S (b). Due to the low signal to noise ratio data could not be fitted accurately and therefore only raw data are shown.

## Supplementary figure 2

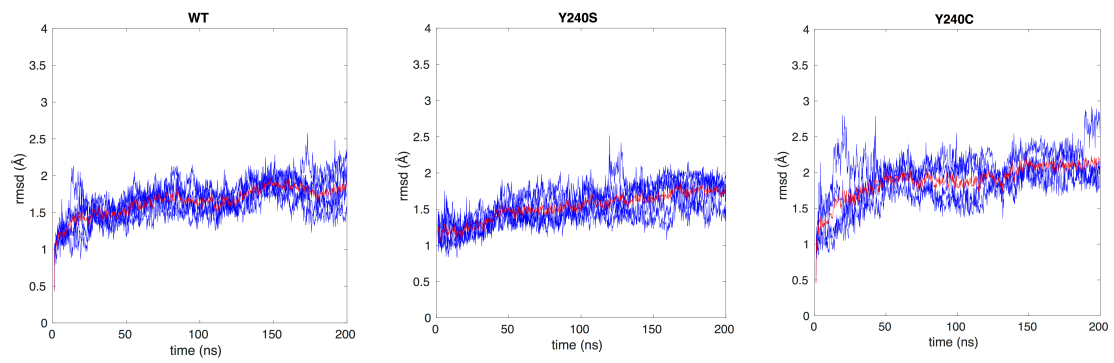

**Figure S2.** The root-mean-squared-deviation (rmsd) to the starting conformation for each of the five 200 ns trajectories for WT, Y240S, and Y240C (blue), the average highlighted in red.

## Supplementary table 1

**Table S1.** The total interaction strength (Total Int), average interaction strength (Ave Int), and number of interacting residues (#Int) for the ten most interacting residues based on the protein network analysis of MD simulation.

| Rank | chain:residue | Total Int | Ave Int | #Int |
|------|---------------|-----------|---------|------|
| 1    | A:138         | 109.65    | 6.09    | 18   |
| 2    | A:204         | 104.97    | 10.50   | 10   |
| 3    | A:155         | 102.18    | 7.30    | 14   |
| 4    | A:199         | 98.30     | 7.56    | 13   |
| 5    | A:181         | 93.88     | 7.22    | 13   |
| 6    | A:235         | 92.77     | 8.43    | 11   |
| 7    | A:76          | 92.69     | 11.59   | 8    |
| 8    | A:242         | 87.58     | 9.73    | 9    |
| 9    | A:131         | 84.19     | 6.01    | 14   |
| 10   | A:239         | 83.86     | 6.99    | 12   |
| 11   | A:149         | 82.08     | 8.21    | 10   |
| 12   | A:49          | 79.75     | 3.80    | 21   |
| 13   | A:115         | 78.85     | 7.17    | 11   |
| 14   | A:79          | 78.00     | 6.00    | 13   |
| 15   | A:130         | 77.87     | 9.73    | 8    |
| 16   | A:57          | 76.81     | 5.49    | 14   |
| 17   | A:69          | 76.02     | 4.22    | 18   |
| 18   | A:135         | 75.88     | 3.79    | 20   |
| 19   | A:53          | 74.71     | 5.75    | 13   |
| 20   | A:182         | 74.04     | 8.23    | 9    |
| 21   | A:184         | 73.98     | 9.25    | 8    |
| 22   | A:150         | 73.47     | 5.25    | 14   |
| 23   | A:166         | 72.93     | 3.47    | 21   |
| 24   | A:174         | 72.10     | 6.01    | 12   |
| 25   | A:143         | 72.08     | 6.01    | 12   |
| 26   | A:170         | 68.70     | 3.43    | 20   |
| 27   | A:148         | 68.39     | 5.26    | 13   |
| 28   | A:112         | 67.85     | 6.78    | 10   |
| 29   | A:66          | 66.86     | 5.57    | 12   |
| 30   | A:86          | 66.77     | 7.42    | 9    |
| 31   | A:128         | 66.11     | 6.61    | 10   |
| 32   | A:185         | 66.02     | 4.40    | 15   |
| 33   | A:173         | 63.79     | 6.38    | 10   |
| 34   | A:180         | 63.12     | 5.26    | 12   |
| 35   | A:214         | 62.44     | 7.81    | 8    |
| 36   | A:163         | 60.66     | 3.37    | 18   |
| 37   | A:120         | 60.56     | 12.11   | 5    |
| 38   | A:89          | 59.85     | 5.44    | 11   |
| 39   | A:65          | 59.23     | 8.46    | 7    |
| 40   | A:146         | 58.93     | 5.89    | 10   |
| 41   | A:72          | 58.72     | 4.52    | 13   |
| 42   | A:158         | 57.23     | 4.09    | 14   |
| 43   | A:99          | 56.30     | 4.33    | 13   |
| 44   | A:208         | 56.03     | 4.31    | 13   |
| 45   | A:96          | 55.73     | 5.07    | 11   |
| 46   | A:63          | 55.65     | 6.18    | 9    |
| 47   | A:207         | 55.41     | 6.16    | 9    |
| 48   | A:230         | 53.84     | 2.69    | 20   |
| 49   | A:154         | 53.76     | 4.89    | 11   |
| 50   | A:118         | 53.72     | 5.37    | 10   |
| 51   | A:29          | 53.33     | 1.62    | 33   |

---

|     |       |       |      |    |
|-----|-------|-------|------|----|
| 52  | A:48  | 52.46 | 2.91 | 18 |
| 53  | A:156 | 52.29 | 5.23 | 10 |
| 54  | A:56  | 52.28 | 3.27 | 16 |
| 55  | A:26  | 52.04 | 2.37 | 22 |
| 56  | A:232 | 52.00 | 5.20 | 10 |
| 57  | A:240 | 51.64 | 5.16 | 10 |
| 58  | A:87  | 50.64 | 7.23 | 7  |
| 59  | A:141 | 50.35 | 5.04 | 10 |
| 60  | A:217 | 49.73 | 4.97 | 10 |
| 61  | A:227 | 48.96 | 4.08 | 12 |
| 62  | A:100 | 47.45 | 5.27 | 9  |
| 63  | A:241 | 47.26 | 4.30 | 11 |
| 64  | A:78  | 47.03 | 3.14 | 15 |
| 65  | A:121 | 46.23 | 5.78 | 8  |
| 66  | A:67  | 44.62 | 4.96 | 9  |
| 67  | A:203 | 43.18 | 3.32 | 13 |
| 68  | A:46  | 43.10 | 2.69 | 16 |
| 69  | A:187 | 42.33 | 4.23 | 10 |
| 70  | A:24  | 41.53 | 1.98 | 21 |
| 71  | A:152 | 41.13 | 2.06 | 20 |
| 72  | A:237 | 41.07 | 2.74 | 15 |
| 73  | A:178 | 40.10 | 4.01 | 10 |
| 74  | A:84  | 39.21 | 4.90 | 8  |
| 75  | A:77  | 38.80 | 2.98 | 13 |
| 76  | A:192 | 38.80 | 2.98 | 13 |
| 77  | A:91  | 38.54 | 2.75 | 14 |
| 78  | A:151 | 37.28 | 3.73 | 10 |
| 79  | A:82  | 35.95 | 3.99 | 9  |
| 80  | A:119 | 35.24 | 7.05 | 5  |
| 81  | A:33  | 35.03 | 2.06 | 17 |
| 82  | A:80  | 34.52 | 4.32 | 8  |
| 83  | A:68  | 33.86 | 3.76 | 9  |
| 84  | A:52  | 33.85 | 2.60 | 13 |
| 85  | A:107 | 33.11 | 6.62 | 5  |
| 86  | A:179 | 32.85 | 2.99 | 11 |
| 87  | A:167 | 32.45 | 3.24 | 10 |
| 88  | A:32  | 32.15 | 1.53 | 21 |
| 89  | A:171 | 31.34 | 2.24 | 14 |
| 90  | A:211 | 31.30 | 3.13 | 10 |
| 91  | A:196 | 29.74 | 1.65 | 18 |
| 92  | A:75  | 29.40 | 2.67 | 11 |
| 93  | A:133 | 28.61 | 3.58 | 8  |
| 94  | A:105 | 28.57 | 3.17 | 9  |
| 95  | A:90  | 28.31 | 2.18 | 13 |
| 96  | A:109 | 28.20 | 7.05 | 4  |
| 97  | A:40  | 28.19 | 1.04 | 27 |
| 98  | A:38  | 27.29 | 1.09 | 25 |
| 99  | A:74  | 27.23 | 2.09 | 13 |
| 100 | A:169 | 27.04 | 2.70 | 10 |
| 101 | A:97  | 26.87 | 3.36 | 8  |
| 102 | A:41  | 26.65 | 1.40 | 19 |
| 103 | A:191 | 26.55 | 2.66 | 10 |
| 104 | A:201 | 25.77 | 2.58 | 10 |
| 105 | A:64  | 25.59 | 3.20 | 8  |
| 106 | A:93  | 25.44 | 3.18 | 8  |
| 107 | A:157 | 25.31 | 1.69 | 15 |
| 108 | A:102 | 25.25 | 2.81 | 9  |
| 109 | A:220 | 24.98 | 2.08 | 12 |
| 110 | A:28  | 24.96 | 1.92 | 13 |
| 111 | A:98  | 24.57 | 2.23 | 11 |
| 112 | A:103 | 23.61 | 1.97 | 12 |

---

---

|     |       |       |      |    |
|-----|-------|-------|------|----|
| 113 | A:183 | 23.18 | 2.90 | 8  |
| 114 | A:197 | 23.08 | 1.44 | 16 |
| 115 | A:159 | 22.06 | 1.47 | 15 |
| 116 | A:70  | 21.74 | 3.11 | 7  |
| 117 | A:198 | 20.96 | 1.31 | 16 |
| 118 | A:137 | 20.82 | 2.08 | 10 |
| 119 | A:122 | 20.09 | 4.02 | 5  |
| 120 | A:222 | 19.88 | 2.21 | 9  |
| 121 | A:81  | 19.46 | 3.89 | 5  |
| 122 | A:136 | 19.05 | 1.27 | 15 |
| 123 | A:30  | 18.89 | 1.57 | 12 |
| 124 | A:50  | 18.77 | 2.09 | 9  |
| 125 | A:147 | 18.63 | 2.33 | 8  |
| 126 | A:140 | 18.61 | 1.69 | 11 |
| 127 | A:110 | 18.47 | 3.08 | 6  |
| 128 | A:189 | 18.39 | 2.63 | 7  |
| 129 | A:238 | 18.16 | 1.82 | 10 |
| 130 | A:212 | 18.00 | 2.00 | 9  |
| 131 | A:160 | 17.50 | 1.17 | 15 |
| 132 | A:139 | 17.36 | 1.58 | 11 |
| 133 | A:219 | 17.31 | 2.88 | 6  |
| 134 | A:19  | 17.08 | 0.78 | 22 |
| 135 | A:132 | 16.61 | 2.37 | 7  |
| 136 | A:18  | 16.57 | 0.66 | 25 |
| 137 | A:73  | 16.38 | 1.49 | 11 |
| 138 | A:47  | 15.84 | 0.93 | 17 |
| 139 | A:223 | 15.72 | 2.25 | 7  |
| 140 | A:60  | 15.58 | 1.20 | 13 |
| 141 | A:236 | 15.47 | 2.21 | 7  |
| 142 | A:244 | 15.41 | 1.71 | 9  |
| 143 | A:206 | 14.85 | 1.49 | 10 |
| 144 | A:162 | 14.43 | 0.96 | 15 |
| 145 | A:195 | 14.09 | 0.67 | 21 |
| 146 | A:42  | 14.05 | 0.88 | 16 |
| 147 | A:216 | 13.88 | 3.47 | 4  |
| 148 | A:114 | 13.73 | 2.29 | 6  |
| 149 | A:134 | 13.70 | 1.71 | 8  |
| 150 | A:218 | 13.55 | 1.51 | 9  |
| 151 | A:129 | 13.51 | 2.70 | 5  |
| 152 | A:55  | 13.27 | 2.21 | 6  |
| 153 | A:226 | 13.24 | 0.78 | 17 |
| 154 | A:164 | 13.10 | 1.31 | 10 |
| 155 | A:188 | 12.17 | 2.43 | 5  |
| 156 | A:224 | 12.09 | 1.01 | 12 |
| 157 | A:17  | 12.06 | 0.43 | 28 |
| 158 | A:39  | 11.86 | 0.70 | 17 |
| 159 | A:228 | 11.79 | 2.36 | 5  |
| 160 | A:177 | 11.75 | 2.35 | 5  |
| 161 | A:37  | 11.72 | 0.49 | 24 |
| 162 | A:92  | 11.58 | 1.45 | 8  |
| 163 | A:54  | 11.47 | 1.64 | 7  |
| 164 | A:94  | 11.43 | 1.63 | 7  |
| 165 | A:25  | 11.37 | 0.95 | 12 |
| 166 | A:123 | 10.95 | 1.83 | 6  |
| 167 | A:233 | 10.56 | 2.11 | 5  |
| 168 | A:243 | 10.40 | 1.73 | 6  |
| 169 | A:205 | 9.90  | 1.41 | 7  |
| 170 | A:127 | 9.90  | 1.10 | 9  |
| 171 | A:34  | 9.73  | 1.08 | 9  |
| 172 | A:22  | 9.73  | 0.57 | 17 |
| 173 | A:215 | 9.38  | 1.56 | 6  |

---

---

|     |       |      |      |    |
|-----|-------|------|------|----|
| 174 | A:31  | 8.89 | 0.81 | 11 |
| 175 | A:168 | 8.69 | 1.24 | 7  |
| 176 | A:43  | 8.67 | 0.67 | 13 |
| 177 | A:20  | 8.23 | 0.41 | 20 |
| 178 | A:186 | 7.38 | 0.92 | 8  |
| 179 | A:23  | 7.28 | 0.49 | 15 |
| 180 | A:35  | 7.10 | 0.59 | 12 |
| 181 | A:225 | 6.99 | 1.75 | 4  |
| 182 | A:51  | 6.71 | 1.12 | 6  |
| 183 | A:213 | 6.21 | 3.10 | 2  |
| 184 | A:190 | 6.10 | 1.02 | 6  |
| 185 | A:193 | 5.90 | 0.42 | 14 |
| 186 | A:200 | 5.63 | 0.80 | 7  |
| 187 | A:44  | 5.04 | 0.56 | 9  |
| 188 | A:21  | 4.70 | 0.25 | 19 |
| 189 | A:165 | 4.44 | 0.56 | 8  |
| 190 | A:124 | 4.27 | 1.42 | 3  |
| 191 | A:101 | 3.93 | 0.98 | 4  |
| 192 | A:106 | 3.88 | 1.94 | 2  |
| 193 | A:142 | 3.57 | 0.40 | 9  |
| 194 | A:58  | 3.35 | 0.26 | 13 |
| 195 | A:221 | 2.97 | 0.49 | 6  |
| 196 | A:27  | 2.91 | 0.22 | 13 |
| 197 | A:85  | 2.72 | 1.36 | 2  |
| 198 | A:245 | 2.68 | 0.38 | 7  |
| 199 | A:202 | 2.33 | 0.39 | 6  |
| 200 | A:172 | 2.05 | 0.41 | 5  |
| 201 | A:229 | 1.39 | 0.15 | 9  |
| 202 | A:108 | 1.25 | 0.63 | 2  |
| 203 | A:210 | 1.20 | 0.15 | 8  |
| 204 | A:234 | 1.18 | 0.24 | 5  |
| 205 | A:125 | 0.88 | 0.29 | 3  |
| 206 | A:116 | 0.80 | 0.16 | 5  |
| 207 | A:145 | 0.71 | 0.10 | 7  |
| 208 | A:111 | 0.50 | 0.25 | 2  |
| 209 | A:61  | 0.36 | 0.12 | 3  |
| 210 | A:176 | 0.11 | 0.03 | 4  |
| 211 | A:113 | 0.02 | 0.00 | 4  |
| 212 | A:104 | 0.02 | 0.01 | 2  |
| 213 | A:95  | 0.00 | 0.00 | 0  |
| 214 | A:88  | 0.00 | 0.00 | 0  |
| 215 | A:83  | 0.00 | 0.00 | 0  |
| 216 | A:71  | 0.00 | 0.00 | 0  |
| 217 | A:62  | 0.00 | 0.00 | 0  |
| 218 | A:59  | 0.00 | 0.00 | 0  |
| 219 | A:45  | 0.00 | 0.00 | 0  |
| 220 | A:36  | 0.00 | 0.00 | 0  |
| 221 | A:231 | 0.00 | 0.00 | 0  |
| 222 | A:209 | 0.00 | 0.00 | 0  |
| 223 | A:194 | 0.00 | 0.00 | 0  |
| 224 | A:175 | 0.00 | 0.00 | 0  |
| 225 | A:161 | 0.00 | 0.00 | 0  |
| 226 | A:153 | 0.00 | 0.00 | 0  |
| 227 | A:144 | 0.00 | 0.00 | 0  |
| 228 | A:126 | 0.00 | 0.00 | 0  |
| 229 | A:117 | 0.00 | 0.00 | 0  |

---
